# Supplementary material for: Designing and implementing a practical prehospital emergency trauma care curriculum for lay first responders in Guatemala
Source: PubMed Central journal article supplement — Trauma Surg Acute Care Open. 2020 Apr 2;5(1):e000409. doi: 10.1136/tsaco-2019-000409 (PMC7254122; doi:10.1136/tsaco-2019-000409), 2020-04-02
Supplement: tsaco-2019-000409supp001.pdf [file tsaco-2019-000409supp001.pdf]

**Supplementary Material:***Test Item Analysis*

Participant performance on each question of the training assessment improved significantly for each item on the pre- and post-tests, except for questions 7(7), 12(23), and 22(10). Prior to training, 11 out of 26 total questions (42.3%) showed that the majority of participants reported the correct answer, while 15 questions (57.7%) showed that the majority of participants reported the incorrect answer. Contrastingly, 23 questions (88.5%) showed that the majority of participants reported the correct answer on the post-assessment, while 3 questions (11.5%) showed that the majority of participants chose the incorrect answer on the post-assessment. Question 6(3) showed the maximum improvement between the pre- and post- assessments (82.6%,  $p < 0.001$ ) (Table 5).

*Item-difficulty Index*

Indices were assigned based on the proportion of questions correctly answered on both the pre- and post-training assessments, ranging from 0 to 1. Pre-test item difficulty indices ranged from 0.05 to 0.81 whereas post-test item difficulty indices ranged from 0.42 to 0.96. Generally, good questions should score between 0.30 and 0.80, however indices are subject to be lower for pre-test scores and higher for post-test scores (17). All questions showed an increase in PPDI (Pretest Posttest Difference Index) except for question 23(12). Seven pretest questions had item difficulty indices below 0.30 [questions 6(3), 9(16), 10(21), 19(12), 20(18), 24(19), and 26(13)] while only question 25(20) had an index above 0.80. No posttest questions showed an item difficulty index below 0.30 while nine showed indices greater than 0.80 [questions 2(1), 18(2), 6(3), 17(5), 3(9), 13(15), 25(20), 10(21), and 21(24)].

*Item-discrimination Index*

Item discrimination indices were assigned using point bi-serial correlation coefficients, or Rpbi-values, to assess the representativeness of a question for the general participants' total performance. Assigned values range from 0 to 1, with 0 representing a question that is in no way correlated with total performance, and a value of 1 representing a question that is perfectly correlated with performance. Generally, a value of 0.25 or greater shows that a given question discriminates well. Pre-test Rpbi-values ranged from -0.08 to 0.54 where post-test values ranged from 0.08 to 0.52. Eight questions on the pre-test yielded an Rpbi-value less than 0.25 [questions 6(3), 10(21), 15(6), 17(5), 19(12), 20(18), 24(19), 26(13)], while only three post-test questions yielded an Rpbi-value of less than 0.25

[questions 25(20), 24(19), and 17(5)]. One question on the pre-test yielded a negative Rpbj-value [question 20(20), R= -0.08]. Per-question data is presented in Table 6 and Table 7.

#### *Proportion Correct by Quartile*

Test questions that discriminate well should show the greatest amount of correct answers in the highest quartile, along with a sequential increase in percent correct across quartile (17). Twenty-two (84.6%) pre-training assessment questions showed that the highest quartile contained the highest percent of correct answers, while all post-training assessment questions showed that the highest quartile contained the highest percent of correct answers (Table 6, Table 7). Of these questions, 23.1% showed a sequential increase on the pre-training assessment, while 50.0% showed a sequential increase on the post-training assessment.

*Table 4: Exam Questions and Answers*

| Pre (Post) | Question                                                                                                                                                                               | Pre (Post)                              | Answers                                                                                                                                                         |
|------------|----------------------------------------------------------------------------------------------------------------------------------------------------------------------------------------|-----------------------------------------|-----------------------------------------------------------------------------------------------------------------------------------------------------------------|
| 1 (14)     | The most secure way to stop bleeding is:                                                                                                                                               | 1 (3)<br>2 (1)<br><b>3 (4)</b><br>4 (2) | Using a tourniquet<br>Pouring clean water on wound<br><b>Applying direct pressure, elevating the wound</b><br>Elevating the wound and using a tourniquet        |
| 2 (1)      | When approaching the scene of an accident, the first step should be:                                                                                                                   | 1 (4)<br>2 (2)<br><b>3 (3)</b><br>4 (1) | Run to the victim<br>Establish which victims you should treat first<br><b>Make sure the scene is safe for you and others</b><br>Continue driving carefully      |
| 3 (9)      | When responding to an injured patient, what is the first thing you should do?                                                                                                          | 1 (4)<br>2 (1)<br>3 (3)<br><b>4 (2)</b> | Check if he/she is bleeding<br>Assess for signs of injuries<br>Move the patient into a vehicle<br><b>Check if he/she has an open airway and is breathing</b>    |
| 4 (25)     | What is the best position for transporting an unconscious patient who does not present with a trauma?                                                                                  | 1 (1)<br><b>2 (3)</b><br>3 (4)<br>4 (2) | Lying on their back<br><b>Lying on their side in the recovery position</b><br>Lying on their abdomen<br>Sitting upright                                         |
| 5 (26)     | In an emergency, when transporting someone to a health facility, it is important to drive as fast as possible because it will make a difference because the patient's life is at risk. | 1 (1)<br><b>2 (2)</b>                   | True<br><b>False</b>                                                                                                                                            |
| 6 (3)      | The "safety zone" around the scene in case of spills of hazardous materials must be at least:                                                                                          | 1 (2)<br>2 (1)<br><b>3 (3)</b><br>4 (4) | 30 m/100 ft<br>15 m/50 ft<br><b>6 m/20 ft</b><br>3 m/10 ft                                                                                                      |
| 7 (7)      | In case of mass casualties, you should prioritize the evaluation of the person who is:                                                                                                 | 1 (1)<br>2 (3)<br><b>3 (2)</b><br>4 (4) | Shouting for help<br>Has a fractured leg and it is bleeding<br><b>Is not breathing and is turning blue</b><br>Has no breathing and no pulse                     |
| 8 (11)     | For the unconscious patient, the first priority is to:                                                                                                                                 | <b>1 (3)</b><br>2 (1)<br>3 (2)<br>4 (4) | <b>Open the mouth with chin lift head tilt</b><br>Keep warm with a blanket<br>Begin CPR immediately<br>Swipe mouth with two fingers to see if there's an object |
| 9 (16)     | When using a tourniquet to stop bleeding, you should:                                                                                                                                  | 1 (3)<br><b>2 (2)</b>                   | Keep the bleeding site covered<br><b>Write the time of application on the victim's</b>                                                                          |

|         |                                                                                                       |                                         |                                                                                                                                                                                                                                                                        |
|---------|-------------------------------------------------------------------------------------------------------|-----------------------------------------|------------------------------------------------------------------------------------------------------------------------------------------------------------------------------------------------------------------------------------------------------------------------|
|         |                                                                                                       | 3 (1)<br>4 (4)                          | <b>forehead using a pen</b><br>Make sure it is not too tight so it does not cut off all blood circulation in the extremity<br>Never use a tourniquet to control bleeding                                                                                               |
| 10 (21) | A patient with a pelvic fracture can lose up to:                                                      | 1 (3)<br>2 (4)<br><b>3 (1)</b><br>4 (2) | 1/2L of blood<br>1L of blood<br><b>5L of blood</b><br>Not much blood because the pelvis has no blood vessels                                                                                                                                                           |
| 11 (22) | Splinting of a fractured extremity is important because:                                              | 1 (3)<br>2 (1)<br>3 (2)<br><b>4 (4)</b> | Alleviates pain<br>Limits blood loss<br>Facilitates transport<br><b>All of the above</b>                                                                                                                                                                               |
| 12 (23) | Splints should:                                                                                       | 1 (1)<br>2 (3)<br><b>3 (4)</b><br>4 (2) | Be made as tight as possible<br>Provide support only at the site of the injury<br><b>Should be long enough to immobilize above and below the injury</b><br>A splint should not be used because it may worsen the injury                                                |
| 13 (15) | When there exists an impaled object, you should:                                                      | 1 (1)<br>2 (3)<br>3 (4)<br><b>4 (2)</b> | Remove it as fast as possible<br>Cut the protruding portion of the object<br>Pour water and keep it wet<br><b>Protect the object and maintain its position using bulky dressing around it</b>                                                                          |
| 14 (17) | In a burned patient:                                                                                  | 1 (2)<br>2 (4)<br><b>3 (3)</b><br>4 (1) | Complete burns (3rd degree) are painful and moist<br>Superficial burns (1st degree) should be treated with creams<br><b>Blisters indicate a 2nd degree burn</b><br>Blisters should be excised as soon as possible                                                      |
| 15 (6)  | When at a mass casualty scene, you should ask:                                                        | <b>1 (2)</b><br>2 (3)<br>3 (4)<br>4 (1) | <b>Those who can walk to walk away from the scene</b><br>Those who can't move should wait until help arrives<br>Victims to divide themselves in groups of 4 to facilitate their transport<br>Do not approach mass casualty scenes until help arrives                   |
| 16 (4)  | When there are body fluids, you should:                                                               | 1 (4)<br><b>2 (2)</b><br>3 (1)<br>4 (3) | Stop your rescue efforts because it is very dangerous<br><b>Pour water on the area to rinse it and use gloves to protect your hands</b><br>Use clean cotton materials to absorb the fluids<br>Pour vinegar on the area of your body that is in contact with the fluids |
| 17 (5)  | If you do not have access to gloves, you may use plastic bags to protect your hands from body fluids: | <b>1 (1)</b><br>2 (2)                   | <b>True</b><br>False                                                                                                                                                                                                                                                   |
| 18 (2)  | You witnessed a collision with a car and a pedestrian. Of all the options, you should:                | 1 (3)<br>2 (2)<br>3 (1)<br><b>4 (4)</b> | Track the offending vehicle<br>Immediately put victim in your vehicle<br>Should always help regardless of what the victim says<br><b>Call for backup</b>                                                                                                               |
| 19 (12) | When you elevate the chin and tilt the head, this:                                                    | 1 (3)<br>2 (2)<br>3 (4)<br><b>4 (1)</b> | Stimulates the patient to breathe when he/she is unconscious<br>Removes foreign bodies from the mouth<br>Stabilizes the cervical spine<br><b>Lifts the tongue from the throat</b>                                                                                      |
| 20 (18) | When you decide that a patient needs CPR, the first thing you should do is:                           | 1 (1)<br><b>2 (3)</b>                   | Begin CPR immediately<br><b>Call for backup for immediate appropriate transportation (if not already available)</b>                                                                                                                                                    |

|         |                                                                                                    |                                         |                                                                                                                                                                                                                                                      |
|---------|----------------------------------------------------------------------------------------------------|-----------------------------------------|------------------------------------------------------------------------------------------------------------------------------------------------------------------------------------------------------------------------------------------------------|
|         |                                                                                                    | 3 (2)<br>4 (4)                          | Wait until the patient is safe in a vehicle for transport before you begin CPR<br>Leave him/her and declare the death of the patient at the scene                                                                                                    |
| 21 (24) | When you notice a protruding bone, you should:                                                     | 1 (3)<br>2 (1)<br>3 (2)<br><b>4 (4)</b> | Reduce the fracture by pulling on the limb<br>Push the protruding bone back into its place<br>Apply a tourniquet above the fracture site<br><b>Cover with clean, wet gauze</b>                                                                       |
| 22 (10) | When you ask a patient their name and they respond appropriately you know:                         | 1 (2)<br>2 (1)<br>3 (3)<br><b>4 (4)</b> | That the airway is open<br>That they are breathing<br>That the circulation to the brain is sufficient<br><b>All of the above</b>                                                                                                                     |
| 23 (8)  | Which patient would you attend to first at the scene of an accident?                               | 1 (3)<br><b>2 (1)</b><br>3 (2)<br>4 (4) | A 25-year-old who is walking around moaning<br><b>A 35-year-old female who is bleeding from an amputated leg</b><br>A 7-year-old boy who is lying down and has no pulse and no breathing<br>A 20-year-old who is screaming because his/her leg hurts |
| 24 (19) | At the scene of an accident, you should only perform CPR until appropriate transport is available. | <b>1 (1)</b><br>2 (2)                   | <b>True</b><br>False                                                                                                                                                                                                                                 |
| 25 (20) | During a transport of a patient in an ambulance, you may continue to perform CPR on the patient.   | <b>1 (1)</b><br>2 (2)                   | <b>True</b><br>False                                                                                                                                                                                                                                 |
| 26 (13) | Which of the following places can be a site of invisible bleeding?                                 | 1 (2)<br>2 (4)<br>3 (3)<br>4 (1)        | Head<br>Forearm<br>Foot<br><b>Thigh</b>                                                                                                                                                                                                              |

Table 5: Participant Performance by Question

| Matched Test Questions Pre (Post) | Correct-Correct (%) | Incorrect-Incorrect (%) | Correct-Incorrect (%) | Incorrect-Correct (%) | PPDI (%)* | p-value** |
|-----------------------------------|---------------------|-------------------------|-----------------------|-----------------------|-----------|-----------|
| 1 (14)                            | 50.2                | 15.7                    | 11.8                  | 22.3                  | 10        | 0.003     |
| 2 (1)                             | 72.5                | 2.8                     | 1.0                   | 23.7                  | 23        | <0.001    |
| 3 (9)                             | 52.6                | 8.0                     | 10.8                  | 28.6                  | 18        | <0.001    |
| 4 (25)                            | 25.4                | 27.5                    | 4.9                   | 42.2                  | 37        | <0.001    |
| 5 (26)                            | 34.1                | 24.7                    | 4.9                   | 36.2                  | 31        | <0.001    |
| 6 (3)                             | 5.2                 | 11.5                    | 0.3                   | 82.9                  | 83        | <0.001    |
| 7 (7)                             | 32.1                | 29.6                    | 17.4                  | 20.9                  | 3         | 0.391     |

|         |      |      |      |      |    |        |
|---------|------|------|------|------|----|--------|
| 8 (11)  | 47.0 | 14.6 | 11.1 | 27.2 | 16 | <0.001 |
| 9 (16)  | 22.6 | 22.0 | 1.7  | 53.7 | 52 | <0.001 |
| 10 (21) | 4.5  | 14.6 | 0.7  | 80.1 | 79 | <0.001 |
| 11 (22) | 36.2 | 35.9 | 9.8  | 18.1 | 8  | 0.010  |
| 12 (23) | 41.1 | 25.4 | 18.1 | 15.3 | -3 | 0.475  |
| 13 (15) | 73.5 | 7.0  | 1.7  | 17.8 | 16 | <0.001 |
| 14 (17) | 30.7 | 26.1 | 2.1  | 41.1 | 39 | <0.001 |
| 15 (6)  | 33.8 | 26.5 | 6.6  | 33.1 | 26 | <0.001 |
| 16 (4)  | 31.0 | 26.8 | 7.7  | 34.5 | 27 | <0.001 |
| 17 (5)  | 54.7 | 1.7  | 3.8  | 39.7 | 36 | <0.001 |
| 18 (2)  | 50.5 | 12.2 | 3.8  | 33.4 | 30 | <0.001 |
| 19 (12) | 9.4  | 53.0 | 2.1  | 35.5 | 33 | <0.001 |
| 20 (18) | 6.3  | 53.7 | 4.2  | 35.9 | 32 | <0.001 |
| 21 (24) | 63.8 | 10.8 | 4.5  | 20.9 | 16 | <0.001 |
| 22 (10) | 59.2 | 17.4 | 9.1  | 14.3 | 5  | 0.087  |
| 23 (8)  | 34.8 | 20.6 | 3.5  | 41.1 | 38 | <0.001 |
| 24 (19) | 17.1 | 44.9 | 10.5 | 27.5 | 17 | <0.001 |

|         |      |      |     |      |    |        |
|---------|------|------|-----|------|----|--------|
| 25 (20) | 78.4 | 2.1  | 3.1 | 16.4 | 13 | <0.001 |
| 26 (13) | 5.2  | 46.3 | 2.8 | 45.6 | 43 | <0.001 |

*Bold = answer choice with the highest proportion of responders per question*

*\*PPDI- Pre Post Difference Index, showing the percentage difference in pre- and post-assessment scores*

*\*\*McNemar's Chi-Squared test utilized to assess significance*

*Table 6: Item Analysis of Pre-assessment Questions*

| Test Question | Choices |      |      |      |           | Difficulty Index | Point bi-serial Correlation | Quartiles     |               |               |               |
|---------------|---------|------|------|------|-----------|------------------|-----------------------------|---------------|---------------|---------------|---------------|
|               | 1(%)    | 2(%) | 3(%) | 4(%) | Blank (%) |                  |                             | 1(%)<br>12-35 | 2(%)<br>36-42 | 3(%)<br>42-54 | 4(%)<br>54-81 |
| 1             | 23      | 1.4  | 62.4 | 12.2 | 1         | 0.62             | 0.52                        | 4.5           | 16            | 17.1          | <b>24.4</b>   |
| 2             | 5.6     | 17.8 | 74.2 | 0.7  | 1.7       | 0.73             | 0.44                        | 9.4           | 21.3          | 17.4          | <b>25.4</b>   |
| 3             | 7       | 28.2 | 0.7  | 63.8 | 0.3       | 0.63             | 0.26                        | 11.1          | 18.1          | 10.8          | <b>23.3</b>   |
| 4             | 61.3    | 30.7 | 2.4  | 4.5  | 1.1       | 0.30             | 0.33                        | 2.8           | 5.6           | 9.1           | <b>12.9</b>   |
| 5*            | 60.3    | 39.4 | 0    | 0    | 0.3       | 0.39             | 0.33                        | 5.6           | 7             | 10.1          | <b>16.4</b>   |
| 6             | 64.5    | 18.1 | 5.9  | 6.6  | 4.9       | 0.06             | 0.07                        | 0.7           | 1.7           | 0.7           | <b>2.4</b>    |
| 7             | 15      | 12.9 | 49.8 | 21.6 | 0.7       | 0.49             | 0.29                        | 7             | 13.6          | 10.5          | <b>18.5</b>   |
| 8             | 58.9    | 1.4  | 27.5 | 10.8 | 1.4       | 0.58             | 0.37                        | 8             | 15.7          | 12.5          | <b>22</b>     |
| 9             | 16      | 24.7 | 39   | 18.1 | 2.2       | 0.24             | 0.33                        | 1.4           | 6.3           | 4.9           | <b>11.8</b>   |
| 10            | 13.9    | 17.1 | 5.6  | 50.5 | 12.9      | 0.05             | 0.12                        | 0.7           | 1.4           | 0.3           | <b>2.8</b>    |
| 11            | 11.8    | 8.4  | 29.3 | 46.3 | 4.2       | 0.46             | 0.46                        | 5.2           | 9.1           | 10.5          | <b>21.3</b>   |

|     |      |      |      |      |     |      |       |            |             |            |             |
|-----|------|------|------|------|-----|------|-------|------------|-------------|------------|-------------|
| 12  | 1.7  | 29.6 | 59.6 | 3.1  | 6   | 0.59 | 0.39  | 7.3        | 15.7        | 13.2       | <b>23</b>   |
| 13  | 16.4 | 4.2  | 1    | 76   | 2.4 | 0.75 | 0.54  | 8          | 22          | 18.5       | <b>26.8</b> |
| 14  | 36.6 | 23   | 33.1 | 2.4  | 4.9 | 0.33 | 0.44  | 1.4        | 8.4         | 5.6        | <b>17.4</b> |
| 15  | 40.8 | 31.4 | 16.4 | 8.4  | 3   | 0.40 | 0.23  | 5.9        | 11.8        | 8.4        | <b>14.3</b> |
| 16  | 9.8  | 39   | 44.3 | 1.7  | 5.2 | 0.39 | 0.33  | 4.2        | 8.4         | 11.1       | <b>15</b>   |
| 17* | 58.9 | 36.9 | 0    | 0    | 4.2 | 0.59 | 0.06  | 13.2       | <b>18.1</b> | 9.1        | <b>18.1</b> |
| 18  | 2.4  | 5.9  | 34.1 | 55.1 | 2.5 | 0.54 | 0.39  | 6.3        | 15.7        | 10.5       | <b>22</b>   |
| 19  | 72.1 | 5.2  | 8    | 11.8 | 2.9 | 0.11 | 0.19  | 1          | 2.8         | 2.4        | <b>5.2</b>  |
| 20  | 82.6 | 10.8 | 3.8  | 0.7  | 2.1 | 0.10 | 0.18  | 1          | 3.5         | 2.1        | <b>3.8</b>  |
| 21  | 7    | 3.1  | 18.1 | 69   | 2.8 | 0.68 | 0.38  | 10.1       | 18.5        | 15.3       | <b>24.4</b> |
| 22  | 4.2  | 10.1 | 14.3 | 68.6 | 2.8 | 0.68 | 0.42  | 9.8        | 17.8        | 15         | <b>25.8</b> |
| 23  | 0.7  | 39   | 55.1 | 1    | 4.2 | 0.38 | 0.36  | 4.2        | 8.4         | 7.7        | <b>18.1</b> |
| 24* | 27.9 | 67.9 | 0    | 0    | 4.2 | 0.28 | -0.08 | <b>8.7</b> | 7           | 5.6        | 6.3         |
| 25* | 82.2 | 14.3 | 0    | 0    | 3.5 | 0.82 | 0.26  | 13.9       | <b>24.4</b> | 19.5       | 23.7        |
| 26  | 84   | 2.4  | 2.8  | 8.4  | 2.4 | 0.08 | 0.06  | 1          | 2.1         | <b>2.8</b> | 2.1         |

\* True/False Question

Table 7: Item Analysis of Post-assessment Questions

| Test Question | Choices |      |      |      |           | Difficulty Index | Point bi-serial Correlation | Quartiles         |                   |                   |                   |
|---------------|---------|------|------|------|-----------|------------------|-----------------------------|-------------------|-------------------|-------------------|-------------------|
|               | 1(%)    | 2(%) | 3(%) | 4(%) | Blank (%) |                  |                             | 1(%)<br>12-<br>58 | 2(%)<br>59-<br>69 | 3(%)<br>70-<br>77 | 4(%)<br>78-<br>96 |
| 1             | 0       | 2.1  | 96.5 | 0.7  | 0.7       | 0.96             | 0.26                        | 19.2              | 21.6              | 18.5              | <b>36.9</b>       |
| 2             | 12.2    | 2.8  | 0    | 84.3 | 0.7       | 0.84             | 0.30                        | 14.6              | 15.7              | 18.5              | <b>35.2</b>       |
| 3             | 1.4     | 5.2  | 88.5 | 4.2  | 0.7       | 0.88             | 0.35                        | 15.3              | 19.2              | 17.8              | <b>35.9</b>       |
| 4             | 28.6    | 65.9 | 0    | 2.8  | 2.7       | 0.66             | 0.32                        | 8                 | 16                | 10.5              | <b>31</b>         |
| 5*            | 94.8    | 3.8  | 0    | 0    | 1.4       | 0.94             | 0.23                        | 18.5              | 20.6              | 18.1              | <b>37.3</b>       |
| 6             | 3.1     | 67.2 | 10.1 | 17.1 | 2.5       | 0.67             | 0.32                        | 9.4               | 13.6              | 14.3              | <b>29.6</b>       |
| 7             | 7.3     | 53.3 | 27.2 | 10.1 | 2.1       | 0.53             | 0.35                        | 5.6               | 9.8               | 10.5              | <b>27.2</b>       |
| 8             | 76.3    | 20.2 | 0.3  | 2.1  | 1.1       | 0.76             | 0.37                        | 12.5              | 13.9              | 15.3              | <b>34.1</b>       |
| 9             | 14.3    | 81.5 | 0.7  | 3.5  | 0         | 0.81             | 0.29                        | 12.9              | 19.2              | 15                | <b>34.1</b>       |
| 10            | 11.1    | 8.4  | 6.6  | 73.9 | 0         | 0.74             | 0.43                        | 9.8               | 13.2              | 16                | <b>34.5</b>       |
| 11            | 0.3     | 19.2 | 74.6 | 4.9  | 1         | 0.74             | 0.30                        | 11.5              | 14.6              | 14.6              | <b>33.4</b>       |
| 12            | 45.3    | 2.4  | 47.4 | 4.2  | 0.7       | 0.45             | 0.34                        | 4.5               | 8.4               | 8.7               | <b>23.3</b>       |
| 13            | 51.2    | 40.4 | 0.7  | 0.7  | 7         | 0.51             | 0.36                        | 6.3               | 8.4               | 10.8              | <b>25.4</b>       |
| 14            | 0.7     | 20.9 | 5.6  | 72.8 | 0         | 0.72             | 0.45                        | 9.8               | 12.9              | 14.3              | <b>35.5</b>       |
| 15            | 4.9     | 91.6 | 1    | 2.4  | 0.1       | 0.91             | 0.30                        | 17.1              | 19.2              | 17.8              | <b>37.3</b>       |



|     |      |      |      |      |     |      |      |      |      |      |             |
|-----|------|------|------|------|-----|------|------|------|------|------|-------------|
| 16  | 14.6 | 76.7 | 5.2  | 1.7  | 1.8 | 0.76 | 0.46 | 11.1 | 14.3 | 14.6 | <b>36.2</b> |
| 17  | 2.4  | 16.4 | 72.1 | 6.6  | 2.5 | 0.72 | 0.46 | 9.1  | 12.9 | 15   | <b>34.8</b> |
| 18  | 47   | 8.7  | 42.5 | 0.7  | 1.1 | 0.42 | 0.44 | 4.5  | 4.2  | 7.3  | <b>26.1</b> |
| 19* | 44.9 | 55.1 | 0    | 0    | 0   | 0.45 | 0.08 | 9.1  | 9.8  | 6.6  | <b>19.2</b> |
| 20* | 95.1 | 3.8  | 0.3  | 0    | 0.8 | 0.95 | 0.20 | 18.8 | 21.3 | 17.8 | <b>36.9</b> |
| 21  | 85   | 7.3  | 1.7  | 3.8  | 2.2 | 0.85 | 0.42 | 11.8 | 19.2 | 18.1 | <b>35.5</b> |
| 22  | 7    | 7.3  | 27.2 | 54.7 | 3.8 | 0.54 | 0.40 | 6.6  | 9.4  | 10.5 | <b>27.9</b> |
| 23  | 9.4  | 2.4  | 26.8 | 56.8 | 4.6 | 0.56 | 0.31 | 7.7  | 11.5 | 9.4  | <b>27.9</b> |
| 24  | 1    | 7.3  | 3.5  | 85   | 3.2 | 0.85 | 0.45 | 12.5 | 17.8 | 17.1 | <b>37.3</b> |
| 25  | 18.8 | 7.7  | 67.9 | 2.8  | 2.8 | 0.68 | 0.39 | 8.7  | 13.2 | 13.6 | <b>32.1</b> |
| 26* | 27.2 | 70.7 | 0    | 0    | 2.1 | 0.70 | 0.52 | 7    | 12.9 | 15.7 | <b>34.8</b> |

\* True/False Question
